# Supplementary material
Source: HighWire-hosted journal article supplement (https://bmjopenquality.bmj.com/highwire/filestream/136116/field_highwire_adjunct_files/1/ds5021.docx)

**FIGURE 1
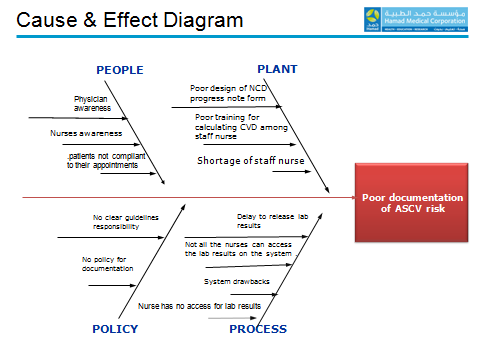
**

**TABLE 1**

Figure 2

Supplement: ds5021.docx [file ds5021.docx]
